# Supplementary material for: The Nutritional Status of Adult Antiretroviral Therapy Recipients with a Recent HIV Diagnosis; A Cross-Sectional Study in Primary Health Facilities in Gauteng, South Africa
Source: MDPI journal article supplement (doi:10.3390/healthcare8030290), 2020-08-24
Supplement: s1 [file s1]

## **QUESTIONNAIRE**

### **PROJECT TITLE**

NUTRITIONAL KNOWLEDGE AND DIETARY PRACTICES OF PEOPLE ON  
ANTIRETROVIRAL THERAPY IN TSHWANE SUB-DISTRICT 1, GAUTENG PROVINCE

**Greetings to participants**

**Introduction by the researcher**

| Participants information                                       | Fill in the information                                          |
|----------------------------------------------------------------|------------------------------------------------------------------|
| Date of participation                                          |                                                                  |
| Participants' code number                                      |                                                                  |
| Contact number                                                 |                                                                  |
| Name of the facility                                           |                                                                  |
| Name of the area                                               |                                                                  |
| <b>SECTION A</b><br><b>Age and anthropometric measurements</b> | <b>Fill in the age, gender and measurements</b>                  |
| 1.1. Age (years)                                               |                                                                  |
| 1.2. Gender                                                    | Male <input type="checkbox"/><br>Female <input type="checkbox"/> |
| 1.3. Weight (kg)                                               | 1.....<br>2.....<br>3.....                                       |
| 1.4. Height (m)                                                | 1.....<br>2.....<br>3.....                                       |
| 1.5. Waist Circumference (cm)                                  | .....                                                            |
| 1.6. Hip Circumference (cm)                                    | .....                                                            |
| <b>SECTION B</b><br><b>Antiretroviral use</b>                  | <b>Please tick the correct answer, Or fill the answer</b>        |
| 1.7. Are you currently using antiretroviral treatment?         | Yes <input type="checkbox"/><br>No <input type="checkbox"/>      |

|                                                                      |                                                                                                                                                            |
|----------------------------------------------------------------------|------------------------------------------------------------------------------------------------------------------------------------------------------------|
| 1.8. How long have you been on antiretroviral treatment? (in months) | .....                                                                                                                                                      |
| <b>SECTION C</b><br><b>Socio-demographic information</b>             | <b>Please tick the correct answer, Or fill the answer</b>                                                                                                  |
| 1.9. Marital status                                                  | Single <input type="checkbox"/><br>Cohabiting <input type="checkbox"/><br>Ever married <input type="checkbox"/>                                            |
| 1.10. Education level                                                | Primary <input type="checkbox"/><br>Secondary <input type="checkbox"/><br>Completed Grade 12 <input type="checkbox"/><br>Tertiary <input type="checkbox"/> |
| 1.11. Employment status                                              | Yes <input type="checkbox"/><br>No <input type="checkbox"/>                                                                                                |
| 1.12. Receiving social grant                                         | Yes <input type="checkbox"/><br>No <input type="checkbox"/>                                                                                                |
| 1.13. Household monthly income                                       | <R5000 <input type="checkbox"/><br>R5001 – R10 000 <input type="checkbox"/><br>>R10 001 <input type="checkbox"/>                                           |
| 1.14. Number of household members                                    | .....                                                                                                                                                      |

Thank you,  
 Researcher's name
